# Supplementary figures and images for: An ionic liquid-mesoporous silica blend as a novel adsorbent for the adsorption and recovery of palladium ions, and its applications in continuous flow study and as an industrial catalyst
Source: Royal Society of Chemistry journal article supplement (doi:10.1039/c5ra26673d), 2016-01-01

Figure S1

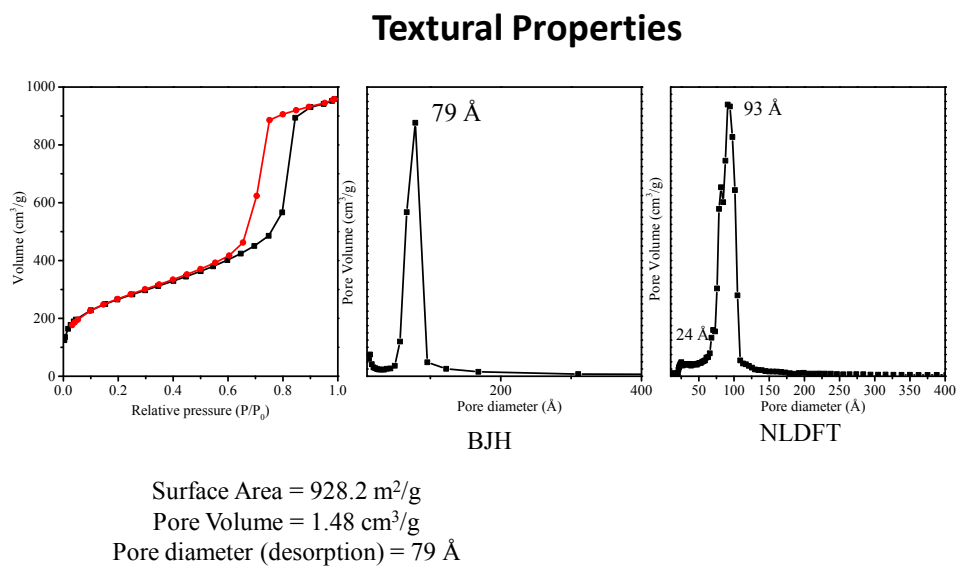

Supplement: c5ra26673d1.pdf [file c5ra26673d1.pdf]
